# Supplementary material for: Synthesis, structure and magnetic properties of ACo5(SeO3)4(OH)2F (A = Rb, Cs): the first compounds with a distorted 2-uniform lattice (T29)
Source: Royal Society of Chemistry journal article supplement (doi:10.1039/d4qi03190c), 2025-01-01
Supplement: d4qi03190c1.pdf [file d4qi03190c1.pdf]

## Supporting Information

### Synthesis, structure and magnetic properties of $A\text{Co}_5(\text{SeO}_3)_4(\text{OH})_2\text{F}$ ( $A = \text{Rb}, \text{Cs}$ ): the first compounds with a distorted 2-uniform lattice (T29)

Wenhao Zhang <sup>a,b</sup>, Meiyan Cui <sup>a</sup>, Zhiying Zhao <sup>a</sup>, Tianyu Zhu <sup>a,b</sup>, Zhangzhen He<sup>\*a</sup>

<sup>a</sup> State Key Laboratory of Structural Chemistry, Fujian Institute of Research on the Structure of Matter, Chinese Academy of Sciences, Fuzhou, 350002, P. R. China.

<sup>b</sup> University of Chinese Academy of Sciences, Beijing, 100049, P. R. China.

\*E-mail: [hez1988@hotmail.com](mailto:hez1988@hotmail.com); [hezz@fjirsm.ac.cn](mailto:hezz@fjirsm.ac.cn).

**Fig. S1** Single crystals of  $(A\text{Co}_5(\text{SeO}_3)_4(\text{OH})_2\text{F})$  ( $A = \text{Rb}, \text{Cs}$ ).

**Fig. S2** The energy-dispersive spectrometry (EDS) elemental analyses of  $A\text{Co}_5(\text{SeO}_3)_4(\text{OH})_2\text{F}$  ( $A = \text{Rb}, \text{Cs}$ ).

**Fig. S3** Experimental and simulated powder X-ray diffraction patterns of  $A\text{Co}_5(\text{SeO}_3)_4(\text{OH})_2\text{F}$  ( $A = \text{Rb}, \text{Cs}$ ).

**Fig. S4** View of the oxygen and fluorine coordination environments for Se and Co.

**Fig. S5** The connection of  $\text{CoO}_4(\text{OH})\text{F}$  and  $\text{CoO}_4(\text{OH})_2$  octahedra within the zigzag-like chain.

**Fig. S6** The specific heat measured at zero magnetic field for  $A\text{Co}_5(\text{SeO}_3)_4(\text{OH})_2\text{F}$  ( $A = \text{Rb}, \text{Cs}$ ).

**Fig. S7** The hysteresis loop measured at 2 K and 20 K for  $\text{CsCo}_5(\text{SeO}_3)_4(\text{OH})_2\text{F}$ .

**Fig. S8** The magnetization curves ( $M$ ) were measured in the range of -1 to 1 T at 2 K, with the applied magnetic field ( $H$ ) oriented both parallel and perpendicular to the  $c$ -axis for  $\text{RbCo}_5(\text{SeO}_3)_4(\text{OH})_2\text{F}$ .

**Table S1** Elements ratio of  $A\text{Co}_5(\text{SeO}_3)_4(\text{OH})_2\text{F}$  ( $A = \text{Rb}, \text{Cs}$ ) determined by EDS.

**Table S2** Atomic coordinates ( $\times 10^4$ ) and equivalent isotropic displacement parameters ( $\text{\AA}^2 \times 10^3$ ) for  $A\text{Co}_5(\text{SeO}_3)_4(\text{OH})_2\text{F}$  ( $A = \text{Rb}, \text{Cs}$ ).

**Table S3** Anisotropic displacement parameters of  $A\text{Co}_5(\text{SeO}_3)_4(\text{OH})_2\text{F}$  ( $A = \text{Rb}, \text{Cs}$ ).

**Table S4** Selected bond lengths [ $\text{\AA}$ ] and bond angles for  $\text{RbCo}_5(\text{SeO}_3)_4(\text{OH})_2\text{F}$ .

**Table S5** Selected bond lengths [ $\text{\AA}$ ] and bond angles for  $\text{CsCo}_5(\text{SeO}_3)_4(\text{OH})_2\text{F}$ .

**Table S6** Bond Valence Sum (BVS) of  $A\text{Co}_5(\text{SeO}_3)_4(\text{OH})_2\text{F}$  ( $A = \text{Rb}, \text{Cs}$ ).

**Table S7** A comparison of the  $\text{Co}\cdots\text{Co}$  distances ( $\text{\AA}$ ) in  $A\text{Co}_5(\text{SeO}_3)_4(\text{OH})_2\text{F}$  ( $A = \text{Rb}$  and  $\text{Cs}$ ).

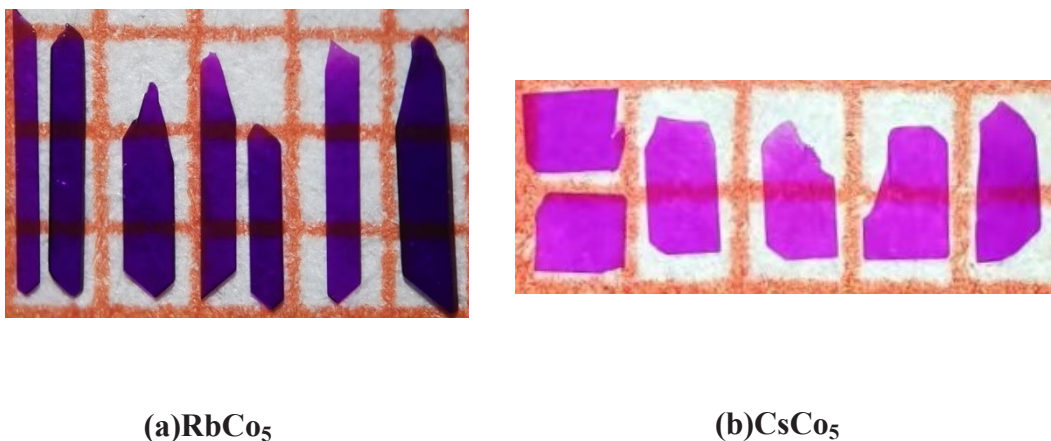

**Fig. S1.** Single crystals of (a)  $\text{RbCo}_5(\text{SeO}_3)_4(\text{OH})_2\text{F}$  (**RbCo<sub>5</sub>**) and (b)  $\text{CsCo}_5(\text{SeO}_3)_4(\text{OH})_2\text{F}$  (**CsCo<sub>5</sub>**).

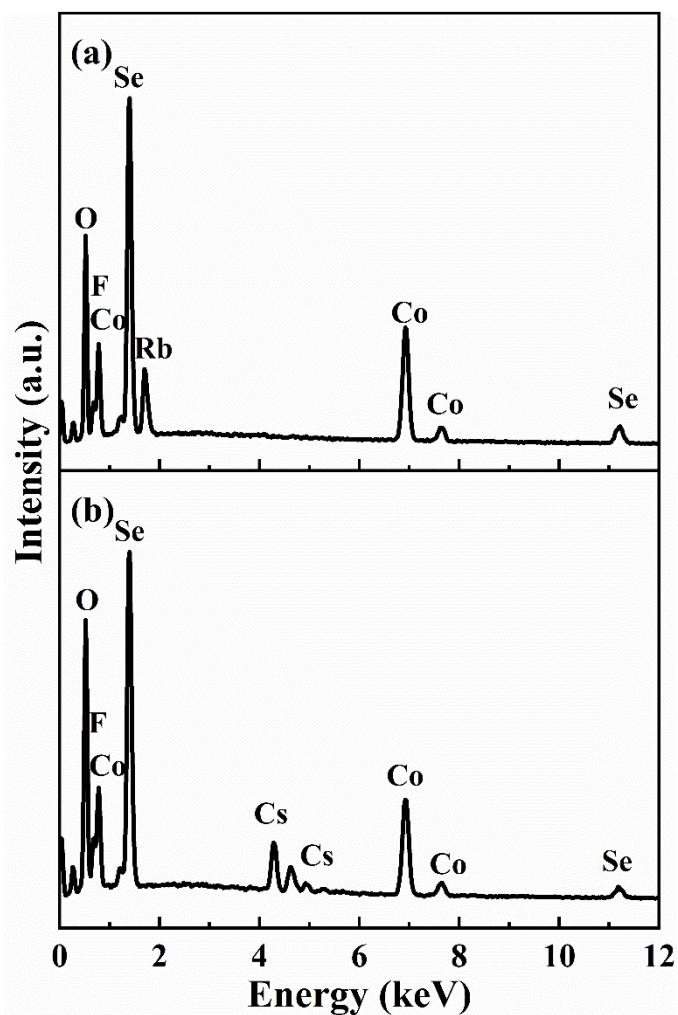

**Fig. S2** The energy-dispersive spectrometry (EDS) elemental analyses of (a)  $\text{RbCo}_5(\text{SeO}_3)_4(\text{OH})_2\text{F}$ , (b)  $\text{CsCo}_5(\text{SeO}_3)_4(\text{OH})_2\text{F}$ .

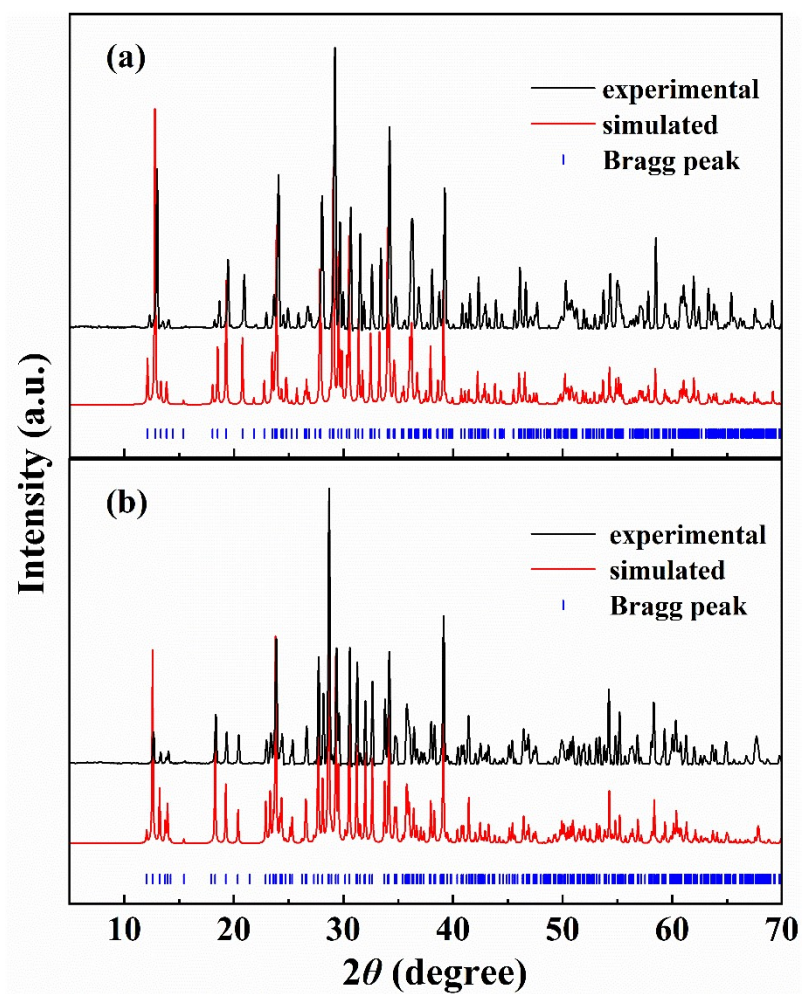

**Fig. S3** Experimental (Black line), Simulated (Red line) and Bragg peak (Blue line) powder X-ray diffraction patterns of (a)  $\text{RbCo}_5(\text{SeO}_3)_4(\text{OH})_2\text{F}$ , (b)  $\text{CsCo}_5(\text{SeO}_3)_4(\text{OH})_2\text{F}$ .

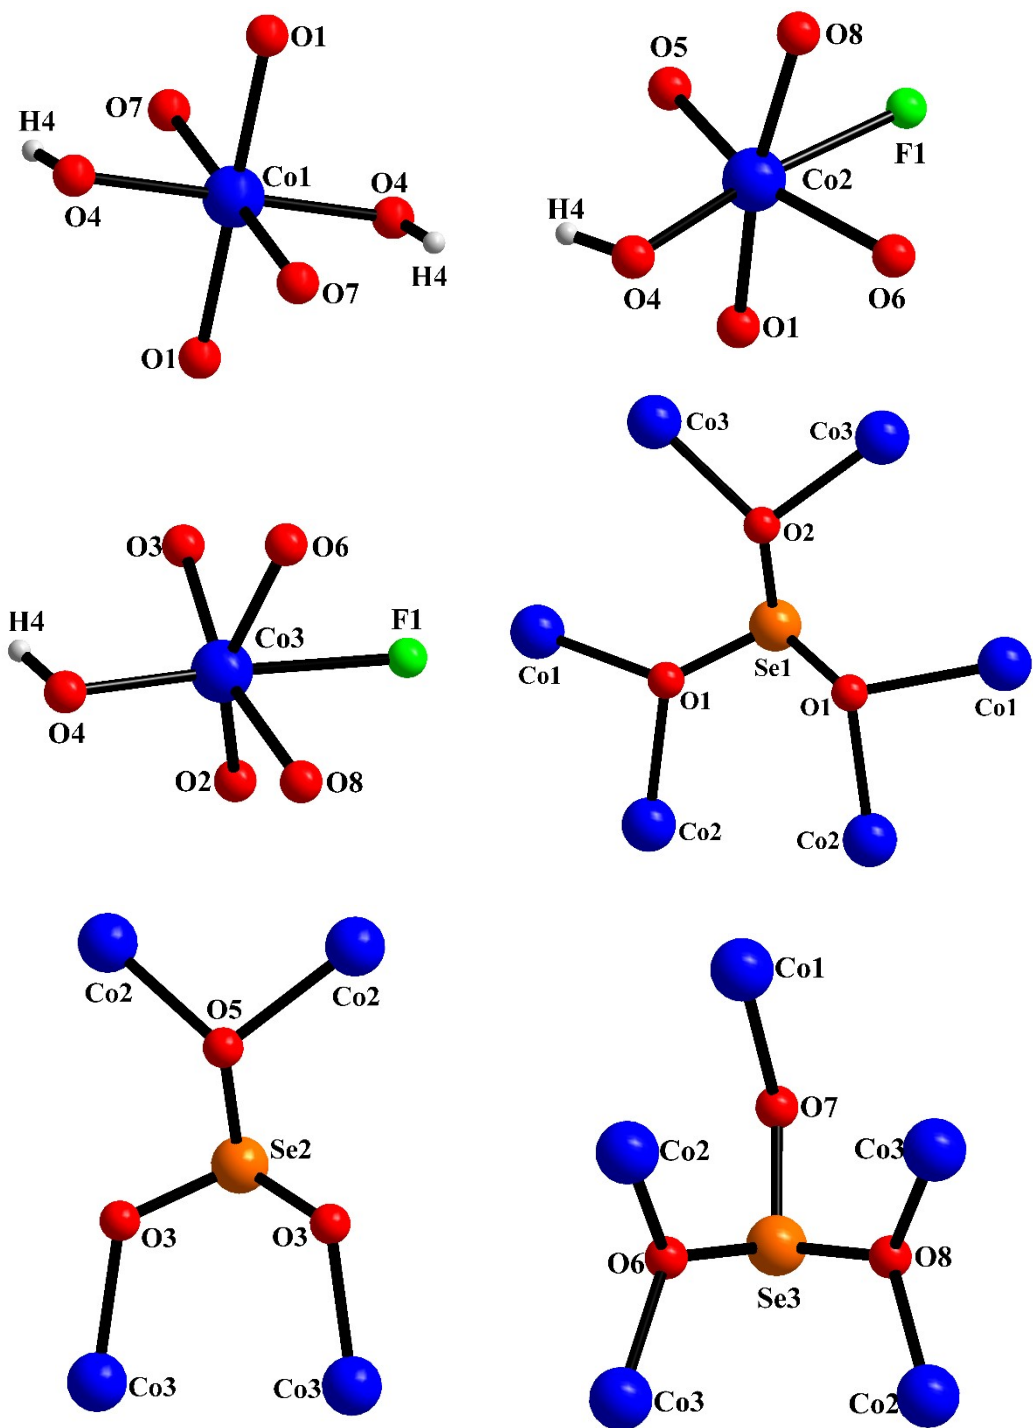

**Fig. S4** View of the oxygen and fluorine coordination environments for Co and Se.

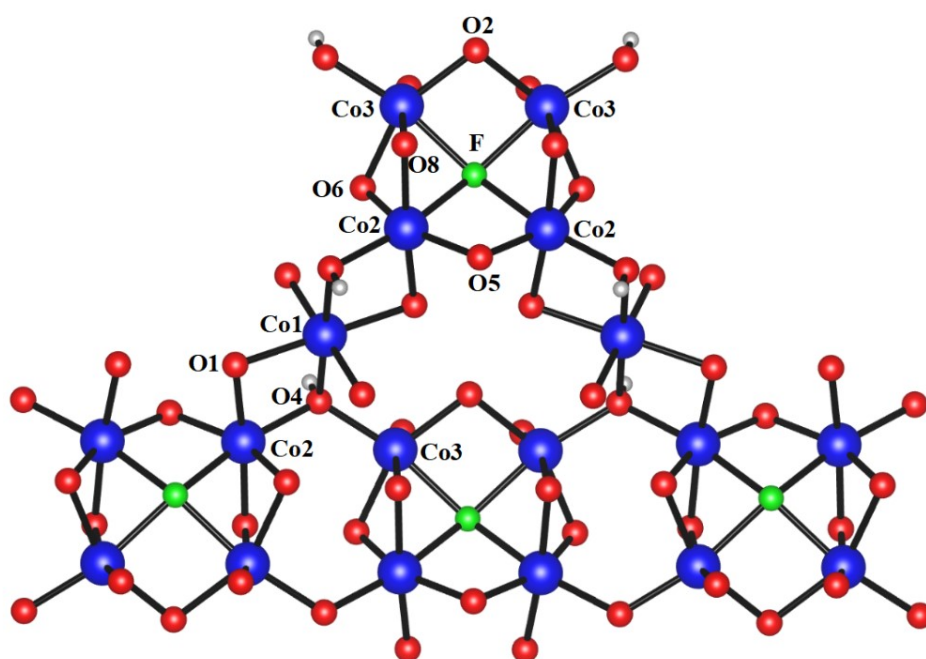

**Fig. S5** The connection of  $\text{CoO}_4(\text{OH})\text{F}$  and  $\text{CoO}_4(\text{OH})_2$  octahedra within the zigzag-like chain.

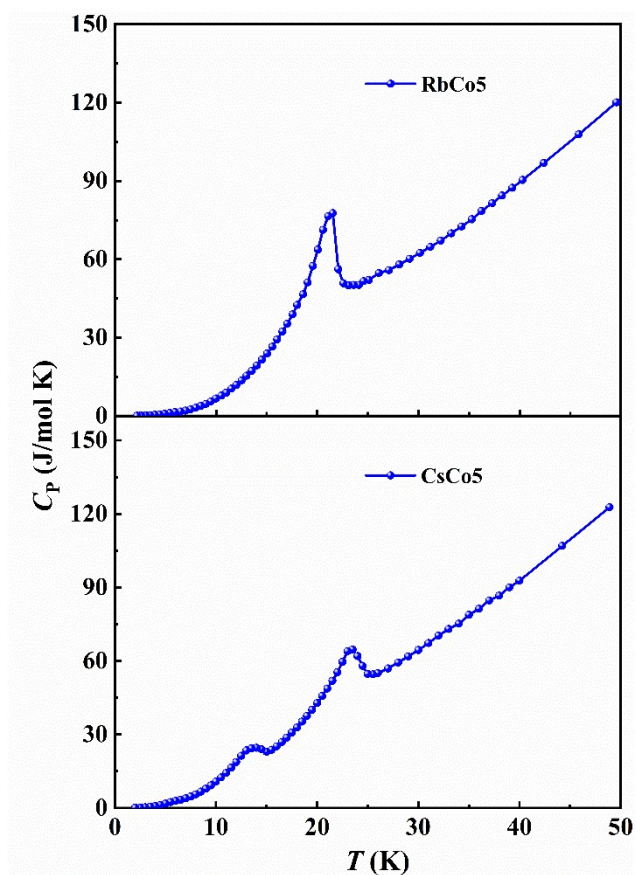

**Fig. S6** The specific heat measured at zero magnetic field for (a)  $\text{RbCo}_5(\text{SeO}_3)_4(\text{OH})_2\text{F}$ , (b)  $\text{CsCo}_5(\text{SeO}_3)_4(\text{OH})_2\text{F}$ .

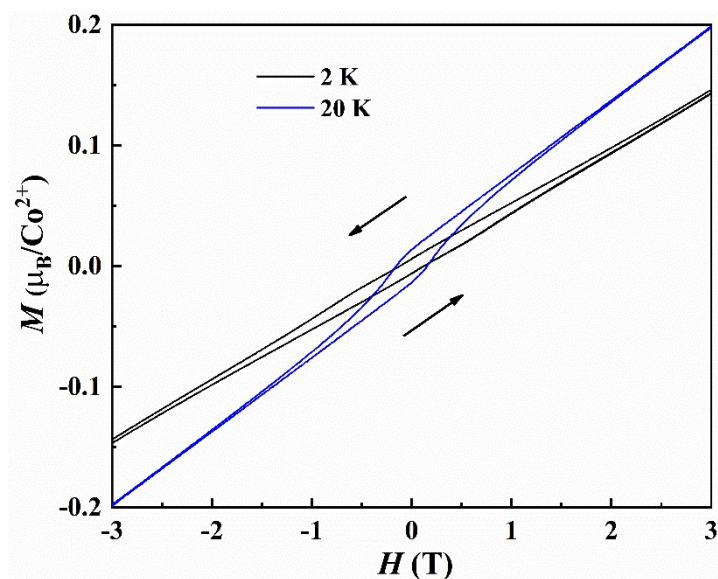

**Fig. S7** The hysteresis loop measured at 2 K and 20 K for  $\text{CsCo}_5(\text{SeO}_3)_4(\text{OH})_2\text{F}$ .

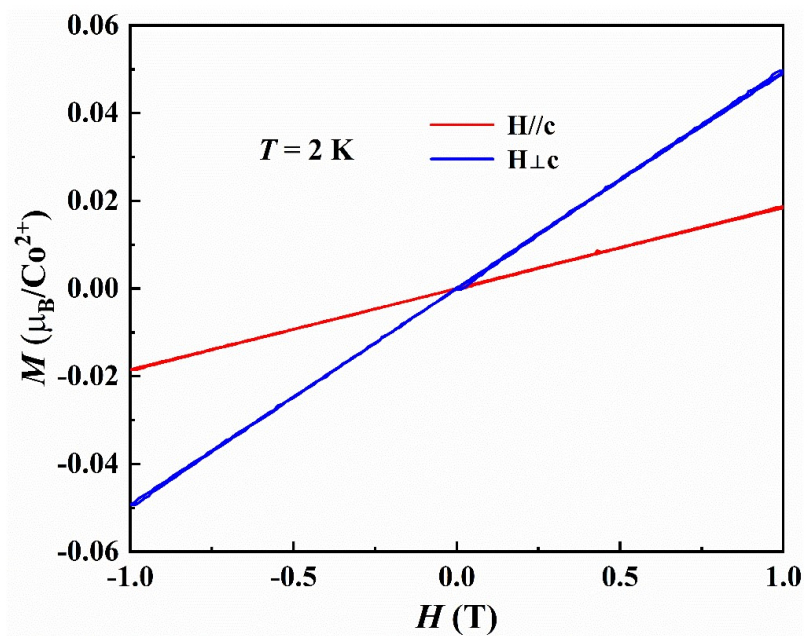

**Fig. S8** The magnetization curves ( $M$ ) were measured in the range of -1 to 1 T at 2 K, with the applied magnetic field ( $H$ ) oriented both parallel and perpendicular to the  $c$ -axis for  $\text{RbCo}_5(\text{SeO}_3)_4(\text{OH})_2\text{F}$ .

**Table S1** Elements ratio of  $ACo_5(SeO_3)_4(OH)_2F$  ( $A = Rb, Cs$ ) determined by EDS.

| Elements %              | RbCo <sub>5</sub> | CsCo <sub>5</sub> |
|-------------------------|-------------------|-------------------|
| <b>A</b>                | 4.0               | 3.8               |
| <b>Co</b>               | 18.2              | 18.4              |
| <b>Se</b>               | 16.5              | 16.3              |
| <b>O</b>                | 56.6              | 56.6              |
| <b>F</b>                | 4.7               | 4.9               |
| <b>Ratio of A/Co/Se</b> | 1/4.6/4.1         | 1/4.8/4.3         |

**Table S2** Atomic coordinates ( $\times 10^4$ ) and equivalent isotropic displacement parameters ( $\text{\AA}^2 \times 10^3$ ) for  $ACo_5(SeO_3)_4(OH)_2F$  ( $A = Rb, Cs$ ).  $U(\text{eq})$  is defined as one third of the trace of the orthogonalized  $U_{ij}$  tensor.

| Atom | x          | y           | z         | U(eq)     |
|------|------------|-------------|-----------|-----------|
| Co1  | 10000      | 10000       | 10000     | 4.93(12)  |
| Co2  | 328.6(6)   | 6311.2(3)   | 3310.2(6) | 4.44(9)   |
| Co3  | 8177.2(6)  | 8735.3(3)   | 5695.4(5) | 4.47(10)  |
| Se1  | 56.4(6)    | 7500        | -367.5(5) | 3.80(9)   |
| Se2  | 4335.1(6)  | 7500        | 5301.1(6) | 4.68(10)  |
| Se3  | -2920.4(4) | 4466.0(2)   | 2313.3(4) | 4.22(8)   |
| O1   | -814(3)    | 6507.2(15)  | 462(3)    | 6.5(4)    |
| O2   | -1577(4)   | 7500        | -2562(4)  | 5.9(6)    |
| O3   | 5289(3)    | 8513.2(15)  | 4673(3)   | 8.2(4)    |
| O4   | 8325(3)    | 10029.9(14) | 7171(3)   | 5.5(4)    |
| O5   | 2152(4)    | 7500        | 3464(4)   | 5.1(6)    |
| O6   | -2234(3)   | 5648.9(14)  | 3080(3)   | 6.0(4)    |
| O7   | -2413(3)   | 4375.8(15)  | 432(3)    | 7.2(4)    |
| O8   | -1115(3)   | 3770.5(14)  | 3866(3)   | 6.2(4)    |
| F1   | -1347(4)   | 7500        | 3962(3)   | 6.0(5)    |
| Rb1  | -4720.8(6) | 7500        | 1133.6(6) | 10.23(10) |



| <b>Atom</b> | <b>x</b>   | <b>y</b>   | <b>z</b>  | <b>U(eq)</b> |
|-------------|------------|------------|-----------|--------------|
| Co1         | 0          | 5000       | 0         | 4.24(15)     |
| Co2         | 461.7(8)   | 3683.3(4)  | 3360.9(7) | 3.69(12)     |
| Co3         | 8243.0(8)  | 3719.1(4)  | 5741.7(7) | 3.69(12)     |
| Se1         | 10141.5(8) | 2500       | 9632.9(7) | 2.95(12)     |
| Se2         | 4393.7(8)  | 2500       | 5332.4(8) | 3.57(12)     |
| Se3         | -2877.5(5) | 5484.5(3)  | 2369.3(5) | 3.67(10)     |
| O1          | 9322(4)    | 3483.7(19) | 10526(4)  | 4.9(4)       |
| O2          | 8465(6)    | 2500       | 7482(5)   | 4.9(4)       |
| O3          | 5375(4)    | 3506(2)    | 4738(4)   | 7.0(6)       |
| O4          | 8327(4)    | 5018(2)    | 7181(4)   | 5.8(5)       |
| O5          | 2268(5)    | 2500       | 3487(5)   | 5.2(8)       |
| O6          | -2071(4)   | 4335.2(19) | 3185(4)   | 5.5(5)       |
| O7          | -2405(4)   | 5561(2)    | 450(4)    | 6.4(6)       |
| O8          | -1177(4)   | 6236.5(19) | 3821(4)   | 5.4(5)       |
| F1          | -1220(5)   | 2500       | 4031(5)   | 6.4(6)       |
| Cs1         | -4602.6(5) | 2500       | 933.1(5)  | 6.92(9)      |

**Table S3** Anisotropic displacement parameters ( $\text{\AA}^2 \times 10^3$ ) of  $A\text{Co}_5(\text{SeO}_3)_4(\text{OH})_2\text{F}$  ( $A = \text{Rb, Cs}$ ). The anisotropic displacement factor exponent takes the form:  $-2 \pi^2 [h^2 a^{*2} U_{11} + \dots + 2 h k a^* b^* U_{12}]$ .

| <b>Atom</b> | <b>U11</b> | <b>U22</b> | <b>U33</b> | <b>U23</b> | <b>U13</b> | <b>U12</b> |
|-------------|------------|------------|------------|------------|------------|------------|
| Co1         | 6.9(3)     | 4.1(3)     | 4.2(3)     | 0.0(2)     | 2.7(2)     | -0.2(2)    |
| Co2         | 5.7(2)     | 4.08(18)   | 4.2(2)     | 0.10(14)   | 2.57(16)   | -0.27(15)  |
| Co3         | 5.1(2)     | 4.45(18)   | 4.1(2)     | -0.07(14)  | 2.13(17)   | -0.55(15)  |
| Se1         | 4.5(2)     | 3.72(18)   | 3.6(2)     | 0          | 2.03(16)   | 0          |
| Se2         | 4.5(2)     | 4.97(19)   | 5.2(2)     | 0          | 2.66(17)   | 0          |
| Se3         | 4.38(15)   | 4.38(14)   | 4.08(15)   | -0.03(10)  | 1.84(12)   | -0.37(10)  |
| O1          | 10.3(11)   | 4.2(9)     | 5.7(11)    | 1.7(8)     | 3.8(9)     | -1.7(8)    |
| O2          | 7.2(15)    | 6.8(13)    | 3.5(14)    | 0          | 1.8(12)    | 0          |
| O3          | 7.6(11)    | 5.5(9)     | 11.7(12)   | 2.7(8)     | 3.9(9)     | -1.2(8)    |
| O4          | 4.3(11)    | 6.1(10)    | 6.4(11)    | 0.7(8)     | 2.5(9)     | 1.5(8)     |
| O5          | 6.5(15)    | 5.2(13)    | 3.6(14)    | 0          | 1.6(12)    | 0          |
| O6          | 7.2(10)    | 5.1(9)     | 5.1(11)    | -2.1(7)    | 1.8(9)     | -1.9(8)    |
| O7          | 9.2(11)    | 9.1(10)    | 4.2(11)    | -1.4(8)    | 3.4(9)     | -2.0(8)    |
| O8          | 7.0(11)    | 8.1(10)    | 3.3(10)    | 2.0(8)     | 1.8(9)     | 2.1(8)     |
| F1          | 5.8(12)    | 4.8(11)    | 6.8(13)    | 0          | 1.8(10)    | 0          |
| Rb1         | 8.5(2)     | 11.00(19)  | 8.2(2)     | 0          | -0.21(17)  | 0          |
| <b>Atom</b> | <b>U11</b> | <b>U22</b> | <b>U33</b> | <b>U23</b> | <b>U13</b> | <b>U12</b> |
| Co1         | 4.8(4)     | 3.0(3)     | 5.3(4)     | 0.1(3)     | 2.2(3)     | 0.4(3)     |
| Co2         | 3.7(2)     | 2.3(2)     | 5.3(3)     | -0.09(18)  | 1.8(2)     | 0.33(18)   |
| Co3         | 3.0(3)     | 2.3(2)     | 5.8(3)     | -0.15(18)  | 1.6(2)     | -0.76(18)  |
| Se1         | 2.7(2)     | 2.0(2)     | 4.3(3)     | 0          | 1.5(2)     | 0          |
| Se2         | 1.9(2)     | 3.2(2)     | 5.7(3)     | 0          | 1.3(2)     | 0          |
| Se3         | 2.41(19)   | 2.99(18)   | 5.3(2)     | 0.15(13)   | 1.05(15)   | 0.65(13)   |
| O1          | 6.3(11)    | 2.9(10)    | 3.8(12)    | -1.3(10)   | -0.3(9)    | -0.7(10)   |
| O2          | 6.3(11)    | 2.9(10)    | 3.8(12)    | -1.3(10)   | -0.3(9)    | -0.7(10)   |
| O3          | 3.7(13)    | 5.6(13)    | 10.2(16)   | 2.0(10)    | 0.8(11)    | -0.8(10)   |
| O4          | 3.4(13)    | 6.9(13)    | 7.1(15)    | -1.1(10)   | 2.0(11)    | -1.2(10)   |

| <b>Atom</b> | <b>U11</b> | <b>U22</b> | <b>U33</b> | <b>U23</b> | <b>U13</b> | <b>U12</b> |
|-------------|------------|------------|------------|------------|------------|------------|
| O5          | 3.1(18)    | 4.8(18)    | 6(2)       | 0          | -0.4(15)   | 0          |
| O6          | 5.8(13)    | 2.3(13)    | 9.8(15)    | 1.2(10)    | 4.6(11)    | 1.0(10)    |
| O7          | 8.0(14)    | 8.6(14)    | 4.0(15)    | 0.8(10)    | 3.9(11)    | 0.8(10)    |
| O8          | 3.8(13)    | 7.0(14)    | 3.6(14)    | -2.4(10)   | -0.9(11)   | -1.8(10)   |
| F1          | 6.7(16)    | 4.4(15)    | 7.6(18)    | 0          | 2.0(13)    | 0          |
| Cs1         | 4.11(17)   | 6.76(17)   | 8.11(19)   | 0          | 0.03(13)   | 0          |

**Table S4** Selected bond lengths [ $\text{\AA}$ ] and bond angles for  $\text{RbCo}_5(\text{SeO}_3)_4(\text{OH})_2\text{F}$ .

| Atom-Atom           | Length/ $\text{\AA}$ | Atom-Atom            | Length/ $\text{\AA}$ |
|---------------------|----------------------|----------------------|----------------------|
| Rb1-F1              | 2.659(3)             | Co1-O4 <sup>10</sup> | 2.107(2)             |
| Rb1-O3 <sup>4</sup> | 3.103(2)             | Co1-O4               | 2.107(2)             |
| Rb1-O3 <sup>5</sup> | 3.103(2)             | Co1-O7 <sup>11</sup> | 2.130(2)             |
| Rb1-O6              | 3.113(2)             | Co1-O7 <sup>7</sup>  | 2.130(2)             |
| Rb1-O6 <sup>1</sup> | 3.113(2)             | Co1-O1 <sup>7</sup>  | 2.163(2)             |
| Rb1-O7 <sup>3</sup> | 3.211(2)             | Co1-O1 <sup>11</sup> | 2.163(2)             |
| Rb1-O7 <sup>6</sup> | 3.211(2)             | Co2-O6               | 2.054(2)             |
| Rb1-O1              | 3.428(2)             | Co2-O5               | 2.060(2)             |
| Rb1-O1 <sup>1</sup> | 3.428(2)             | Co2-O8 <sup>12</sup> | 2.083(2)             |
| Rb1-O5 <sup>4</sup> | 3.487(3)             | Co2-O4 <sup>13</sup> | 2.085(2)             |
| Se1-O2              | 1.700(3)             | Co2-O1               | 2.098(2)             |
| Se1-O1              | 1.708(2)             | Co2-F1               | 2.196(2)             |
| Se1-O1 <sup>1</sup> | 1.708(2)             | Co3-O3               | 2.020(2)             |
| Se2-O3              | 1.684(2)             | Co3-O4               | 2.057(2)             |
| Se2-O3 <sup>1</sup> | 1.684(2)             | Co3-O8 <sup>7</sup>  | 2.091(2)             |
| Se2-O5              | 1.723(3)             | Co3-O2 <sup>8</sup>  | 2.105(2)             |
| Se3-O7              | 1.674(2)             | Co3-O6 <sup>9</sup>  | 2.134(2)             |
| Se3-O6              | 1.691(2)             | Co3-F1 <sup>2</sup>  | 2.251(2)             |
| Se3-O8              | 1.709(2)             | Co3-Co2 <sup>9</sup> | 2.910(5)             |

Symmetry transformations used to generate equivalent atoms:

<sup>1</sup>+X, 3/2-Y, +Z; <sup>2</sup>1+X, +Y, +Z; <sup>3</sup>-1-X, 1-Y, -Z; <sup>4</sup>-1+X, +Y, +Z; <sup>5</sup>-1+X, 3/2-Y, +Z; <sup>6</sup>-1-X, 1/2+Y, -Z; <sup>7</sup>1-X, 1/2+Y, 1-Z; <sup>8</sup>1+X, +Y, 1+Z; <sup>9</sup>1+X, 3/2-Y, +Z; <sup>10</sup>2-X, 2-Y, 2-Z; <sup>11</sup>1+X, 3/2-Y, 1+Z; <sup>12</sup>-X, 1-Y, 1-Z; <sup>13</sup>1-X, -1/2+Y, 1-Z.

| Atom-Atom-Atom | Angle/ $^\circ$ | Atom-Atom-Atom | Angle/ $^\circ$ |
|----------------|-----------------|----------------|-----------------|
|----------------|-----------------|----------------|-----------------|

| <b>Atom-Atom-Atom</b>                | <b>Angle/°</b> | <b>Atom-Atom-Atom</b>                  | <b>Angle/°</b> |
|--------------------------------------|----------------|----------------------------------------|----------------|
| F1-Rb1-O3 <sup>4</sup>               | 64.32(6)       | O4 <sup>10</sup> -Co1-O7 <sup>7</sup>  | 88.01(8)       |
| F1-Rb1-O3 <sup>5</sup>               | 64.32(6)       | O4-Co1-O7 <sup>7</sup>                 | 91.99(8)       |
| O3 <sup>4</sup> -Rb1-O3 <sup>5</sup> | 51.39(7)       | O7 <sup>11</sup> -Co1-O7 <sup>7</sup>  | 180            |
| F1-Rb1-O6                            | 52.21(4)       | O4 <sup>10</sup> -Co1-O1 <sup>7</sup>  | 96.02(8)       |
| O3 <sup>4</sup> -Rb1-O6              | 95.80(5)       | O4-Co1-O1 <sup>7</sup>                 | 83.98(8)       |
| O3 <sup>5</sup> -Rb1-O6              | 54.29(5)       | O7 <sup>11</sup> -Co1-O1 <sup>7</sup>  | 88.72(7)       |
| F1-Rb1-O6 <sup>1</sup>               | 52.21(4)       | O7 <sup>7</sup> -Co1-O1 <sup>7</sup>   | 91.28(7)       |
| O3 <sup>4</sup> -Rb1-O6 <sup>1</sup> | 54.29(5)       | O4 <sup>10</sup> -Co1-O1 <sup>11</sup> | 83.98(8)       |
| O3 <sup>5</sup> -Rb1-O6 <sup>1</sup> | 95.80(5)       | O4-Co1-O1 <sup>11</sup>                | 96.02(8)       |
| O6-Rb1-O6 <sup>1</sup>               | 104.30(8)      | O7 <sup>11</sup> -Co1-O1 <sup>11</sup> | 91.28(7)       |
| F1-Rb1-O7 <sup>3</sup>               | 127.21(4)      | O7 <sup>7</sup> -Co1-O1 <sup>11</sup>  | 88.72(7)       |
| O3 <sup>4</sup> -Rb1-O7 <sup>3</sup> | 117.10(5)      | O1 <sup>7</sup> -Co1-O1 <sup>11</sup>  | 180            |
| O3 <sup>5</sup> -Rb1-O7 <sup>3</sup> | 77.46(5)       | O6-Co2-O5                              | 155.33(8)      |
| O6-Rb1-O7 <sup>3</sup>               | 76.33(5)       | O6-Co2-O8 <sup>12</sup>                | 86.86(8)       |
| O6 <sup>1</sup> -Rb1-O7 <sup>3</sup> | 171.34(5)      | O5-Co2-O8 <sup>12</sup>                | 93.82(10)      |
| F1-Rb1-O7 <sup>6</sup>               | 127.21(4)      | O6-Co2-O4 <sup>13</sup>                | 97.73(8)       |
| O3 <sup>4</sup> -Rb1-O7 <sup>6</sup> | 77.46(5)       | O5-Co2-O4 <sup>13</sup>                | 106.29(8)      |
| O3 <sup>5</sup> -Rb1-O7 <sup>6</sup> | 117.10(5)      | O8 <sup>12</sup> -Co2-O4 <sup>13</sup> | 101.21(8)      |
| O6-Rb1-O7 <sup>6</sup>               | 171.34(5)      | O6-Co2-O1                              | 88.48(8)       |
| O6 <sup>1</sup> -Rb1-O7 <sup>6</sup> | 76.33(5)       | O5-Co2-O1                              | 87.59(10)      |
| O7 <sup>3</sup> -Rb1-O7 <sup>6</sup> | 101.72(8)      | O8 <sup>12</sup> -Co2-O1               | 171.76(8)      |
| F1-Rb1-O1                            | 62.47(6)       | O4 <sup>13</sup> -Co2-O1               | 86.15(8)       |
| O3 <sup>4</sup> -Rb1-O1              | 126.71(6)      | O6-Co2-F1                              | 74.40(7)       |
| O3 <sup>5</sup> -Rb1-O1              | 105.32(5)      | O5-Co2-F1                              | 81.96(8)       |
| O6-Rb1-O1                            | 52.30(5)       | O8 <sup>12</sup> -Co2-F1               | 74.88(8)       |
| O6 <sup>1</sup> -Rb1-O1              | 89.76(5)       | O4 <sup>13</sup> -Co2-F1               | 171.24(7)      |
| O7 <sup>3</sup> -Rb1-O1              | 97.23(5)       | O1-Co2-F1                              | 97.32(8)       |
| O7 <sup>6</sup> -Rb1-O1              | 136.24(5)      | O3-Co3-O4                              | 99.59(8)       |
| F1-Rb1-O1 <sup>1</sup>               | 62.47(6)       | O3-Co3-O8 <sup>7</sup>                 | 165.11(8)      |
| O3 <sup>4</sup> -Rb1-O1 <sup>1</sup> | 105.32(5)      | O4-Co3-O8 <sup>7</sup>                 | 93.54(8)       |
| O3 <sup>5</sup> -Rb1-O1 <sup>1</sup> | 126.71(6)      | O3-Co3-O2 <sup>8</sup>                 | 87.77(10)      |
| O6-Rb1-O1 <sup>1</sup>               | 89.76(5)       | O4-Co3-O2 <sup>8</sup>                 | 107.93(8)      |

| Atom-Atom-Atom                         | Angle/°    | Atom-Atom-Atom                          | Angle/°    |
|----------------------------------------|------------|-----------------------------------------|------------|
| O6 <sup>1</sup> -Rb1-O1 <sup>1</sup>   | 52.30(5)   | O8 <sup>7</sup> -Co3-O2 <sup>8</sup>    | 94.88(10)  |
| O7 <sup>3</sup> -Rb1-O1 <sup>1</sup>   | 136.24(5)  | O3-Co3-O6 <sup>9</sup>                  | 86.07(8)   |
| O7 <sup>6</sup> -Rb1-O1 <sup>1</sup>   | 97.22(5)   | O4-Co3-O6 <sup>9</sup>                  | 100.72(8)  |
| O1-Rb1-O1 <sup>1</sup>                 | 45.23(6)   | O8 <sup>7</sup> -Co3-O6 <sup>9</sup>    | 84.61(8)   |
| F1-Rb1-O5 <sup>4</sup>                 | 99.73(7)   | O2 <sup>8</sup> -Co3-O6 <sup>9</sup>    | 151.31(8)  |
| O3 <sup>4</sup> -Rb1-O5 <sup>4</sup>   | 45.14(6)   | O3-Co3-F1 <sup>2</sup>                  | 92.51(9)   |
| O3 <sup>5</sup> -Rb1-O5 <sup>4</sup>   | 45.14(6)   | O4-Co3-F1 <sup>2</sup>                  | 165.37(8)  |
| O6-Rb1-O5 <sup>4</sup>                 | 97.70(5)   | O8 <sup>7</sup> -Co3-F1 <sup>2</sup>    | 73.55(8)   |
| O6 <sup>1</sup> -Rb1-O5 <sup>4</sup>   | 97.69(5)   | O2 <sup>8</sup> -Co3-F1 <sup>2</sup>    | 80.57(8)   |
| O7 <sup>3</sup> -Rb1-O5 <sup>4</sup>   | 73.71(5)   | O6 <sup>9</sup> -Co3-F1 <sup>2</sup>    | 71.76(7)   |
| O7 <sup>6</sup> -Rb1-O5 <sup>4</sup>   | 73.71(5)   | Co2-F1-Co2 <sup>1</sup>                 | 91.92(8)   |
| O1-Rb1-O5 <sup>4</sup>                 | 149.96(5)  | Co2-F1-Co3 <sup>4</sup>                 | 154.64(13) |
| O1 <sup>1</sup> -Rb1-O5 <sup>4</sup>   | 149.96(5)  | Co2 <sup>1</sup> -F1-Co3 <sup>4</sup>   | 81.74(3)   |
| O2-Se1-O1                              | 99.26(10)  | Co2-F1-Co3 <sup>5</sup>                 | 81.74(3)   |
| O2-Se1-O1 <sup>1</sup>                 | 99.26(10)  | Co2 <sup>1</sup> -F1-Co3 <sup>5</sup>   | 154.64(13) |
| O1-Se1-O1 <sup>1</sup>                 | 101.03(13) | Co3 <sup>4</sup> -F1-Co3 <sup>5</sup>   | 93.53(8)   |
| O3-Se2-O3 <sup>1</sup>                 | 106.05(14) | Co3-O4-Co2 <sup>7</sup>                 | 120.24(9)  |
| O3-Se2-O5                              | 97.11(10)  | Co3-O4-Co1                              | 117.90(9)  |
| O3 <sup>1</sup> -Se2-O5                | 97.11(10)  | Co2 <sup>7</sup> -O4-Co1                | 94.34(8)   |
| O7-Se3-O6                              | 104.13(10) | Co2-O1-Co1 <sup>13</sup>                | 92.34(8)   |
| O7-Se3-O8                              | 102.39(10) | Co2-O5-Co2 <sup>1</sup>                 | 100.05(12) |
| O6-Se3-O8                              | 101.27(10) | Co2-O6-Co3 <sup>5</sup>                 | 88.02(8)   |
| O4 <sup>10</sup> -Co1-O4               | 180        | Co2 <sup>12</sup> -O8-Co3 <sup>13</sup> | 88.38(9)   |
| O4 <sup>10</sup> -Co1-O7 <sup>11</sup> | 91.99(8)   | Co3 <sup>14</sup> -O2-Co3 <sup>15</sup> | 102.42(12) |
| O4-Co1-O7 <sup>11</sup>                | 88.01(8)   |                                         |            |

Symmetry transformations used to generate equivalent atoms:

<sup>1</sup>+X, 3/2-Y, +Z; <sup>2</sup>1+X, +Y, +Z; <sup>3</sup>-1-X, 1-Y, -Z; <sup>4</sup>-1+X, +Y, +Z; <sup>5</sup>-1+X, 3/2-Y, +Z; <sup>6</sup>-1-X, 1/2+Y, -Z; <sup>7</sup>1-X, 1/2+Y, 1-Z; <sup>8</sup>1+X, +Y, 1+Z; <sup>9</sup>1+X, 3/2-Y, +Z; <sup>10</sup>2-X, 2-Y, 2-Z; <sup>11</sup>1+X, 3/2-Y, 1+Z; <sup>12</sup>-X, 1-Y, 1-Z; <sup>13</sup>1-X, -1/2+Y, 1-Z; <sup>14</sup>-1+X, 3/2-Y, -1+Z; <sup>15</sup>-1+X, +Y, -1+Z.

**Table S5** Selected bond lengths [ $\text{\AA}$ ] and bond angles for  $\text{CsCo}_5(\text{SeO}_3)_4(\text{OH})_2\text{F}$ .

| Atom-Atom           | Length/ $\text{\AA}$ | Atom-Atom            | Length/ $\text{\AA}$ |
|---------------------|----------------------|----------------------|----------------------|
| Cs1-F1              | 2.823(3)             | Co1-O7               | 2.106(3)             |
| Cs1-O6 <sup>1</sup> | 3.222(3)             | Co1-O7 <sup>9</sup>  | 2.106(3)             |
| Cs1-O6              | 3.222(3)             | Co1-O4 <sup>6</sup>  | 2.121(3)             |
| Cs1-O3 <sup>2</sup> | 3.289(3)             | Co1-O4 <sup>10</sup> | 2.121(3)             |
| Cs1-O3 <sup>3</sup> | 3.289(3)             | Co1-O1 <sup>6</sup>  | 2.169(3)             |
| Cs1-O7 <sup>4</sup> | 3.351(3)             | Co1-O1 <sup>10</sup> | 2.169(3)             |
| Cs1-O7 <sup>5</sup> | 3.351(3)             | Co2-O6               | 2.057(3)             |
| Cs1-O1 <sup>6</sup> | 3.355(3)             | Co2-O5               | 2.067(2)             |
| Cs1-O1 <sup>7</sup> | 3.355(3)             | Co2-O4 <sup>10</sup> | 2.077(3)             |
| Cs1-O5 <sup>2</sup> | 3.606(4)             | Co2-O8 <sup>11</sup> | 2.088(3)             |
| Se1-O1 <sup>1</sup> | 1.709(3)             | Co2-O1 <sup>6</sup>  | 2.100(3)             |
| Se1-O1              | 1.709(3)             | Co2-F1               | 2.207(2)             |
| Se1-O2              | 1.710(4)             | Co2-Co3 <sup>2</sup> | 2.926(7)             |
| Se2-O3              | 1.681(3)             | Co3-O3               | 2.036(3)             |
| Se2-O3 <sup>1</sup> | 1.681(3)             | Co3-O4               | 2.064(3)             |
| Se2-O5              | 1.732(4)             | Co3-O2               | 2.098(3)             |
| Se3-O7              | 1.675(3)             | Co3-O6 <sup>12</sup> | 2.108(3)             |
| Se3-O6              | 1.693(3)             | Co3-O8 <sup>10</sup> | 2.112(3)             |
| Se3-O8              | 1.705(3)             | Co3-F1 <sup>12</sup> | 2.243(2)             |

Symmetry transformations used to generate equivalent atoms:

<sup>1</sup>+X, 1/2-Y, +Z; <sup>2</sup>-1+X, +Y, +Z; <sup>3</sup>-1+X, 1/2-Y, +Z; <sup>4</sup>-1-X, -1/2+Y, -Z; <sup>5</sup>-1-X, 1-Y, -Z; <sup>6</sup>-1+X, +Y, -1+Z; <sup>7</sup>-1+X, 1/2-Y, -1+Z; <sup>8</sup>-2+X, +Y, -1+Z; <sup>9</sup>-X, 1-Y, -Z; <sup>10</sup>1-X, 1-Y, 1-Z; <sup>11</sup>-X, 1-Y, 1-Z; <sup>12</sup>1+X, +Y, +Z.

| <b>Atom-Atom-Atom</b>                | <b>Angle/°</b> | <b>Atom-Atom-Atom</b>                  | <b>Angle/°</b> |
|--------------------------------------|----------------|----------------------------------------|----------------|
| F1-Cs1-O6 <sup>1</sup>               | 49.70(5)       | O7-Co1-O4 <sup>13</sup>                | 92.95(11)      |
| F1-Cs1-O6                            | 49.70(5)       | O7 <sup>12</sup> -Co1-O4 <sup>13</sup> | 87.05(11)      |
| O6 <sup>1</sup> -Cs1-O6              | 99.37(10)      | O4 <sup>6</sup> -Co1-O4 <sup>13</sup>  | 180.00(14)     |
| F1-Cs1-O3 <sup>2</sup>               | 60.80(7)       | O7-Co1-O1 <sup>6</sup>                 | 91.50(10)      |
| O6 <sup>1</sup> -Cs1-O3 <sup>2</sup> | 90.41(7)       | O7 <sup>12</sup> -Co1-O1 <sup>6</sup>  | 88.50(10)      |
| O6-Cs1-O3 <sup>2</sup>               | 51.89(7)       | O4 <sup>6</sup> -Co1-O1 <sup>6</sup>   | 96.81(10)      |
| F1-Cs1-O3 <sup>3</sup>               | 60.80(7)       | O4 <sup>13</sup> -Co1-O1 <sup>6</sup>  | 83.19(10)      |
| O6 <sup>1</sup> -Cs1-O3 <sup>3</sup> | 51.89(7)       | O7-Co1-O1 <sup>13</sup>                | 88.50(10)      |
| O6-Cs1-O3 <sup>3</sup>               | 90.41(7)       | O7 <sup>12</sup> -Co1-O1 <sup>13</sup> | 91.50(10)      |
| O3 <sup>2</sup> -Cs1-O3 <sup>3</sup> | 48.33(9)       | O4 <sup>6</sup> -Co1-O1 <sup>13</sup>  | 83.19(10)      |
| F1-Cs1-O7 <sup>4</sup>               | 124.96(5)      | O4 <sup>13</sup> -Co1-O1 <sup>13</sup> | 96.81(10)      |
| O6 <sup>1</sup> -Cs1-O7 <sup>4</sup> | 77.53(7)       | O1 <sup>6</sup> -Co1-O1 <sup>13</sup>  | 180            |
| O6-Cs1-O7 <sup>4</sup>               | 164.74(7)      | O6-Co2-O5                              | 155.08(11)     |
| O3 <sup>2</sup> -Cs1-O7 <sup>4</sup> | 112.92(7)      | O6-Co2-O4 <sup>13</sup>                | 95.54(11)      |
| O3 <sup>3</sup> -Cs1-O7 <sup>4</sup> | 75.85(7)       | O5-Co2-O4 <sup>13</sup>                | 108.72(11)     |
| F1-Cs1-O7 <sup>5</sup>               | 124.96(5)      | O6-Co2-O8 <sup>14</sup>                | 85.89(11)      |
| O6 <sup>1</sup> -Cs1-O7 <sup>5</sup> | 164.74(7)      | O5-Co2-O8 <sup>14</sup>                | 94.27(13)      |
| O6-Cs1-O7 <sup>5</sup>               | 77.52(7)       | O4 <sup>13</sup> -Co2-O8 <sup>14</sup> | 102.14(11)     |
| O3 <sup>2</sup> -Cs1-O7 <sup>5</sup> | 75.85(7)       | O6-Co2-O1 <sup>6</sup>                 | 88.16(11)      |
| O3 <sup>3</sup> -Cs1-O7 <sup>5</sup> | 112.92(7)      | O5-Co2-O1 <sup>6</sup>                 | 87.93(13)      |
| O7 <sup>4</sup> -Cs1-O7 <sup>5</sup> | 101.48(10)     | O4 <sup>13</sup> -Co2-O1 <sup>6</sup>  | 86.00(11)      |
| F1-Cs1-O1 <sup>6</sup>               | 61.97(8)       | O8 <sup>14</sup> -Co2-O1 <sup>6</sup>  | 170.33(11)     |
| O6 <sup>1</sup> -Cs1-O1 <sup>6</sup> | 89.11(7)       | O6-Co2-F1                              | 73.88(10)      |
| O6-Cs1-O1 <sup>6</sup>               | 52.12(7)       | O5-Co2-F1                              | 82.13(10)      |
| O3 <sup>2</sup> -Cs1-O1 <sup>6</sup> | 102.69(7)      | O4 <sup>13</sup> -Co2-F1               | 169.00(10)     |
| O3 <sup>3</sup> -Cs1-O1 <sup>6</sup> | 122.75(7)      | O8 <sup>14</sup> -Co2-F1               | 74.57(11)      |
| O7 <sup>4</sup> -Cs1-O1 <sup>6</sup> | 141.77(6)      | O1 <sup>6</sup> -Co2-F1                | 96.45(12)      |
| O7 <sup>5</sup> -Cs1-O1 <sup>6</sup> | 100.24(6)      | O3-Co3-O4                              | 98.63(11)      |
| F1-Cs1-O1 <sup>7</sup>               | 61.97(8)       | O3-Co3-O2                              | 88.20(13)      |
| O6 <sup>1</sup> -Cs1-O1 <sup>7</sup> | 52.12(7)       | O4-Co3-O2                              | 108.52(12)     |
| O6-Cs1-O1 <sup>7</sup>               | 89.11(7)       | O3-Co3-O6 <sup>11</sup>                | 86.86(11)      |



| Atom-Atom-Atom                        | Angle/°    | Atom-Atom-Atom                          | Angle/°    |
|---------------------------------------|------------|-----------------------------------------|------------|
| O3 <sup>2</sup> -Cs1-O1 <sup>7</sup>  | 122.75(7)  | O4-Co3-O6 <sup>11</sup>                 | 99.49(11)  |
| O3 <sup>3</sup> -Cs1-O1 <sup>7</sup>  | 102.69(7)  | O2-Co3-O6 <sup>11</sup>                 | 151.97(11) |
| O7 <sup>4</sup> -Cs1-O1 <sup>7</sup>  | 100.24(6)  | O3-Co3-O8 <sup>13</sup>                 | 165.79(12) |
| O7 <sup>5</sup> -Cs1-O1 <sup>7</sup>  | 141.77(6)  | O4-Co3-O8 <sup>13</sup>                 | 93.63(11)  |
| O1 <sup>6</sup> -Cs1-O1 <sup>7</sup>  | 46.22(9)   | O2-Co3-O8 <sup>13</sup>                 | 94.73(13)  |
| F1-Cs1-O5 <sup>2</sup>                | 94.94(9)   | O6 <sup>11</sup> -Co3-O8 <sup>13</sup>  | 84.03(11)  |
| O6 <sup>1</sup> -Cs1-O5 <sup>2</sup>  | 93.97(6)   | O3-Co3-F1 <sup>11</sup>                 | 93.45(12)  |
| O6-Cs1-O5 <sup>2</sup>                | 93.97(6)   | O4-Co3-F1 <sup>11</sup>                 | 165.00(10) |
| O3 <sup>2</sup> -Cs1-O5 <sup>2</sup>  | 43.44(7)   | O2-Co3-F1 <sup>11</sup>                 | 80.59(11)  |
| O3 <sup>3</sup> -Cs1-O5 <sup>2</sup>  | 43.44(7)   | O6 <sup>11</sup> -Co3-F1 <sup>11</sup>  | 72.20(10)  |
| O7 <sup>4</sup> -Cs1-O5 <sup>2</sup>  | 71.52(6)   | O8 <sup>13</sup> -Co3-F1 <sup>11</sup>  | 73.39(11)  |
| O7 <sup>5</sup> -Cs1-O5 <sup>2</sup>  | 71.52(6)   | Co2-F1-Co2 <sup>1</sup>                 | 91.71(12)  |
| O1 <sup>6</sup> -Cs1-O5 <sup>2</sup>  | 145.91(6)  | Co2-F1-Co3 <sup>2</sup>                 | 82.20(4)   |
| O1 <sup>7</sup> -Cs1-O5 <sup>2</sup>  | 145.91(6)  | Co2 <sup>1</sup> -F1-Co3 <sup>2</sup>   | 155.29(17) |
| O1 <sup>1</sup> -Se1-O1               | 100.78(18) | Co2-F1-Co3 <sup>3</sup>                 | 155.29(17) |
| O1 <sup>1</sup> -Se1-O2               | 99.21(13)  | Co2 <sup>1</sup> -F1-Co3 <sup>3</sup>   | 82.20(4)   |
| O1-Se1-O2                             | 99.21(13)  | Co3 <sup>2</sup> -F1-Co3 <sup>3</sup>   | 93.37(12)  |
| O3-Se2-O3 <sup>1</sup>                | 106.41(19) | Co2-O5-Co2 <sup>1</sup>                 | 100.04(16) |
| O3-Se2-O5                             | 97.63(13)  | Co3-O4-Co2 <sup>13</sup>                | 121.43(13) |
| O3 <sup>1</sup> -Se2-O5               | 97.62(13)  | Co3-O4-Co1 <sup>10</sup>                | 116.98(13) |
| O7-Se3-O6                             | 103.55(13) | Co2 <sup>13</sup> -O4-Co1 <sup>10</sup> | 94.87(11)  |
| O7-Se3-O8                             | 102.48(13) | Co2 <sup>10</sup> -O1-Co1 <sup>10</sup> | 92.84(10)  |
| O6-Se3-O8                             | 101.65(14) | Co3 <sup>1</sup> -O2-Co3                | 102.12(17) |
| O7-Co1-O7 <sup>12</sup>               | 180        | Co2 <sup>14</sup> -O8-Co3 <sup>13</sup> | 88.31(11)  |
| O7-Co1-O4 <sup>6</sup>                | 87.05(11)  | Co2-O6-Co3 <sup>2</sup>                 | 89.25(11)  |
| O7 <sup>12</sup> -Co1-O4 <sup>6</sup> | 92.95(11)  |                                         |            |

Symmetry transformations used to generate equivalent atoms:

<sup>1</sup>+X, 1/2-Y, +Z; <sup>2</sup>-1+X, +Y, +Z; <sup>3</sup>-1+X, 1/2-Y, +Z; <sup>4</sup>-1-X, -1/2+Y, -Z; <sup>5</sup>-1-X, 1-Y, -Z; <sup>6</sup>-1+X, +Y, -1+Z; <sup>7</sup>-1+X, 1/2-Y, -1+Z; <sup>8</sup>-2+X, +Y, -1+Z; <sup>9</sup>2+X, +Y, 1+Z; <sup>10</sup>1+X, +Y, 1+Z; <sup>11</sup>1+X, +Y, +Z; <sup>12</sup>-X, 1-Y, -Z; <sup>13</sup>1-X, 1-Y, 1-Z; <sup>14</sup>-X, 1-Y, 1-Z.

**Table S6** Bond Valence Sum (BVS) of  $A\text{Co}_5(\text{SeO}_3)_4(\text{OH})_2\text{F}$  ( $A = \text{Rb}$  and  $\text{Cs}$ ).

| Atom              | RbCo <sub>5</sub> | CsCo <sub>5</sub> | <sup>a</sup> CN | Valence |
|-------------------|-------------------|-------------------|-----------------|---------|
| A(1) <sup>a</sup> | 1.010             | 1.046             | 10              | +1      |
| Co(1)             | 1.827             | 1.833             | 6               | +2      |
| Co(2)             | 1.996             | 1.980             | 6               | +2      |
| Co(3)             | 1.948             | 1.937             | 6               | +2      |
| Se(1)             | 3.995             | 3.949             | 3               | +4      |
| Se(2)             | 4.087             | 4.079             | 3               | +4      |
| Se(3)             | 4.149             | 4.151             | 3               | +4      |
| O(1)              | 1.977             | 2.005             | 4               | -2      |
| O(2)              | 2.010             | 1.985             | 3               | -2      |
| O(3)              | 1.924             | 1.911             | 3               | -2      |
| O(4)              | 1.046             | 1.031             | 3               | -1      |
| O(5)              | 2.046             | 2.004             | 4               | -2      |
| O(6)              | 2.162             | 2.188             | 4               | -2      |
| O(7)              | 1.832             | 1.852             | 3               | -2      |
| O(8)              | 2.005             | 1.996             | 3               | -2      |
| F(1)              | 1.088             | 1.089             | 5               | -1      |

<sup>a</sup> CN: coordination number.**Table S7** A comparison of the Co $\cdots$ Co distances ( $\text{\AA}$ ) in  $A\text{Co}_5(\text{SeO}_3)_4(\text{OH})_2\text{F}$  ( $A = \text{Rb}$  and  $\text{Cs}$ ).

|            | RbCo <sub>5</sub> | CsCo <sub>5</sub> |
|------------|-------------------|-------------------|
| Co1-Co2    | 3.074             | 3.093             |
| Co1-Co3    | 3.567             | 3.569             |
| Co2-Co2    | 3.157             | 3.168             |
| Co2-Co3    | 2.910             | 2.926             |
| Co2-Co3    | 3.591             | 3.612             |
| Co3-Co3    | 3.280             | 3.264             |
| Interlayer | 5.442             | 5.473             |
